# Supplementary material
Source: MDPI journal article supplement (https://www.mdpi.com/2073-4395/14/4/650)
Supplement: s1 [file s1]

Archive with 3 entries (3 files):
- Supplementary 1.xls
- Supplementary 2.xls
- Supplementary.pdf
