# Supplementary material
Source: MDPI journal article supplement (https://www.mdpi.com/2073-4395/14/4/650)
Supplement: s1 [file s1 › Supplementary 1.xls]

## Sheet: pseudo_absences_data
latitude	longitude
-45.8783	-67.5172
-39.693	-62.0975
-38.2696	-57.826
-38.2684	-57.8291
-38.0572	-57.5406
-38.0569	-57.5403
-38.0569	-57.5403
-38.0567	-57.5406
-38.036	-62.4678
-37.9446	-57.721
-37.9424	-57.7454
-37.9386	-57.7218
-37.9383	-57.7219
-37.9308	-57.7376
-37.929	-57.7354
-37.9281	-57.7347
-37.3481	-59.1301
-37.3459	-59.1294
-37.3459	-59.1294
-37.1997	-62.7035
-37.1997	-62.7035
-36.759	-62.5018
-36.6631	-56.9462
-35.9756	-62.725
-35.6973	-64.5324
-35.6973	-64.5324
-35.6973	-64.5324
-35.6973	-64.5324
-35.6867	-63.6971
-35.6843	-63.698
-35.683	-63.7028
-35.6816	-63.7018
-35.6797	-63.7024
-35.6796	-63.702
-35.6796	-63.7024
-35.6784	-63.7009
-35.6781	-63.7027
-35.676	-63.6934
-35.6337	-59.6355
-35.6142	-63.6804
-35.614	-63.68
-35.5365	-58.1085
-35.4873	-62.9832
-35.487	-62.983
-35.4411	-58.8071
-35.3926	-57.1506
-35.3874	-57.3384
-35.2963	-59.1339
-35.2753	-59.1053
-35.2733	-57.2479
-35.1854	-59.0975
-35.1854	-59.0975
-35.1337	-57.3864
-35.0234	-57.5211
-35.0234	-57.5211
-35.0234	-57.5211
-35.0234	-57.5211
-34.9319	-57.9409
-34.9315	-57.9409
-34.9312	-57.9417
-34.9292	-57.9414
-34.9167	-57.9667
-34.9113	-57.9374
-34.9111	-57.9364
-34.9103	-57.9409
-34.9088	-57.9345
-34.9066	-57.9313
-34.9064	-57.9314
-34.9056	-57.9327
-34.9055	-57.9431
-34.9042	-57.9448
-34.8999	-57.9237
-34.8838	-56.0525
-34.8822	-56.1179
-34.8795	-56.0919
-34.8657	-58.4114
-34.8656	-58.4114
-34.8654	-54.8231
-34.8639	-58.2241
-34.8611	-57.9139
-34.8611	-57.9139
-34.8602	-58.2249
-34.8551	-58.4157
-34.8507	-57.8875
-34.848	-55.1194
-34.8449	-57.9588
-34.843	-57.9117
-34.843	-57.9117
-34.843	-57.9117
-34.843	-57.9117
-34.8424	-56.0025
-34.8416	-57.9193
-34.8382	-57.903
-34.8382	-57.903
-34.8382	-57.903
-34.8253	-55.0604
-34.8133	-57.9746
-34.8133	-57.9746
-34.8133	-57.9746
-34.8082	-56.0457
-34.8081	-56.0464
-34.8075	-57.9794
-34.7932	-58.5025
-34.7878	-58.0008
-34.7869	-58.3793
-34.7869	-58.3793
-34.7868	-58.3795
-34.7867	-58.4021
-34.7867	-58.3792
-34.7864	-58.3795
-34.7701	-58.0743
-34.7595	-58.8194
-34.7585	-58.1287
-34.7523	-58.1218
-34.72	-55.22
-34.6811	-58.4452
-34.6811	-58.4452
-34.6807	-58.4455
-34.6807	-58.4455
-34.6802	-58.3397
-34.6802	-58.3397
-34.6795	-58.4425
-34.6794	-58.4429
-34.679	-58.4432
-34.6789	-58.4448
-34.6766	-58.8659
-34.6702	-58.6551
-34.6702	-58.6551
-34.6662	-58.8591
-34.6161	-58.3548
-34.6137	-58.3572
-34.6103	-58.3571
-34.6091	-58.3592
-34.6084	-58.3559
-34.6081	-58.3509
-34.6081	-58.351
-34.6081	-58.351
-34.6081	-58.351
-34.6081	-58.351
-34.6081	-58.351
-34.6081	-58.351
-34.6075	-58.3523
-34.6068	-58.3492
-34.6044	-58.3553
-34.604	-58.356
-34.6037	-58.3816
-34.6037	-58.3816
-34.6019	-58.3606
-34.5979	-58.3612
-34.5965	-58.3537
-34.585	-58.4201
-34.5729	-58.4116
-34.5706	-58.4208
-34.5663	-58.4323
-34.5608	-58.4305
-34.5607	-58.4307
-34.5603	-58.435
-34.5601	-58.4305
-34.5601	-58.4305
-34.5601	-58.4305
-34.5601	-58.4305
-34.5601	-58.4305
-34.5601	-58.4305
-34.559	-58.4306
-34.5589	-58.4331
-34.5589	-58.432
-34.5584	-58.4326
-34.5583	-58.4322
-34.5577	-58.4318
-34.5576	-58.433
-34.5576	-58.433
-34.5576	-58.433
-34.5565	-58.4334
-34.5563	-58.434
-34.5559	-58.4348
-34.5556	-58.4351
-34.5555	-58.435
-34.554	-55.9477
-34.525	-58.4655
-34.5229	-58.4656
-34.4928	-58.4791
-34.4918	-58.4794
-34.4918	-58.4794
-34.4918	-58.4794
-34.4916	-58.479
-34.4916	-58.479
-34.4915	-58.48
-34.4911	-58.4801
-34.4751	-58.7537
-34.4737	-57.8486
-34.47	-58.4962
-34.47	-58.4962
-34.4686	-58.4925
-34.4682	-57.8208
-34.4679	-58.4948
-34.4607	-57.8339
-34.4266	-57.834
-34.4258	-58.7676
-34.4256	-58.7677
-34.4256	-58.7674
-34.4237	-53.8681
-34.4237	-53.868
-34.4133	-58.9162
-34.413	-58.9163
-34.413	-58.9163
-34.413	-58.9147
-34.413	-58.9163
-34.4072	-59.0094
-34.3992	-56.4225
-34.3911	-58.689
-34.3911	-58.689
-34.3876	-58.5574
-34.384	-57.8347
-34.3578	-58.5807
-34.3363	-53.8117
-34.3301	-56.7183
-34.2434	-58.65
-34.2428	-58.6507
-34.2411	-58.6541
-34.221	-56.3123
-34.1995	-58.6931
-34.1006	-59.0128
-34.022	-53.6719
-34.0055	-53.5859
-34.0023	-53.5549
-33.863	-58.9656
-33.716	-58.658
-33.716	-58.658
-33.5993	-59.8062
-33.5974	-59.8086
-33.5962	-59.81
-33.5236	-59.9152
-33.5236	-59.9152
-33.4872	-59.9482
-33.4557	-58.8088
-33.4541	-58.8125
-33.4452	-60.0555
-33.4067	-70.6028
-33.4066	-70.6029
-33.4055	-70.6024
-33.398	-70.6025
-33.3729	-56.5154
-33.32	-60.23
-33.3144	-60.2242
-33.2672	-60.2556
-33.2469	-58.0527
-33.1349	-57.1791
-33.1265	-58.342
-33.0667	-58.2547
-33.0661	-58.3869
-33.015	-58.5263
-33.0098	-58.482
-33	-56
-33	-56
-32.9203	-60.7786
-32.9191	-60.5959
-32.842	-68.6101
-32.8403	-68.6021
-32.7913	-60.9398
-32.6605	-58.1413
-32.5132	-58.0434
-32.4492	-58.2269
-32.4075	-63.2402
-32.4075	-63.2402
-32.4075	-63.2402
-32.2345	-55.9233
-32.2276	-55.93
-32.2126	-64.4656
-32.1329	-53.733
-32.127	-58.4388
-32.1219	-60.6336
-32.0384	-52.2506
-32	-61.7
-31.8875	-58.2427
-31.8873	-54.2014
-31.8825	-58.2536
-31.8825	-60.6452
-31.8379	-64.4332
-31.8196	-64.5483
-31.7375	-60.8472
-31.721	-52.1916
-31.7028	-60.4789
-31.6729	-60.759
-31.656	-60.7601
-31.6558	-60.7581
-31.6365	-60.6733
-31.6342	-60.7097
-31.6342	-60.7097
-31.6074	-60.7248
-31.5803	-60.629
-31.5803	-60.629
-31.5803	-60.629
-31.5803	-60.629
-31.5511	-68.713
-31.5081	-60.4809
-31.4409	-60.9385
-31.3567	-55.3972
-31.3245	-64.5084
-31.3122	-64.512
-31.1521	-64.3501
-31.074	-60.9904
-31.0738	-57.8823
-31.0736	-60.9899
-31.047	-50.9916
-30.9886	-57.9242
-30.9473	-59.8114
-30.9473	-59.8114
-30.53	-62.47
-30.4148	-66.3789
-30.25	-60.6667
-30.2393	-57.6016
-30.2314	-50.2542
-30.1903	-57.6139
-30.1463	-50.5071
-30.0784	-51.2483
-30.0594	-51.2327
-30.0544	-51.2312
-30.0393	-51.2417
-29.89	-50.27
-29.8892	-50.254
-29.8834	-51.1707
-29.8831	-51.1735
-29.6143	-53.7708
-29.4647	-56.813
-29.1634	-51.1797
-28.8249	-49.2346
-28.0744	-65.5731
-28.0653	-65.581
-27.8805	-55.1263
-27.8659	-55.1501
-27.8659	-55.1501
-27.8659	-55.1501
-27.6431	-64.3642
-27.4459	-58.6458
-27.4057	-60.7414
-27.3896	-58.9835
-27.3892	-58.9816
-27.3339	-58.9554
-27.135	-49.5283
-27.051	-58.6973
-26.9292	-49.0485
-26.8325	-65.1899
-26.7803	-49.2954
-26.2083	-59.1147
-25.8575	-54.3997
-25.8559	-54.1695
-25.7694	-53.5366
-25.6826	-54.4549
-25.6627	-54.4529
-25.4781	-49.0002
-25.4478	-57.8033
-25.27	-57.63
-25.1449	-58.2422
-24.9848	-65.5446
-24.969	-65.6717
-24.6514	-65.3875
-24.4165	-65.288
-24.3451	-61.3344
-24.1016	-63.265
-23.8987	-61.8537
-23.8987	-61.8537
-23.8987	-61.8537
-23.8076	-46.655
-23.7225	-46.7136
-23.7223	-46.714
-23.7205	-46.7171
-23.5657	-46.731
-23.565	-46.7302
-23.4952	-46.5194
-23.2361	-58.3909
-23.0991	-48.9121
-22.9686	-43.2218
-22.9675	-43.2213
-22.9674	-43.225
-22.906	-47.0145
-22.905	-47.0199
-22.9034	-47.0198
-22.9033	-47.0198
-22.8118	-47.0718
-22.811	-47.0746
-22.3656	-47.357
-21.85	-57.967
-21.1696	-47.8552
-20.8	-57.933
-18.5833	-58.9833
-17.2826	-56.6988
-16.75	-60.9833
-16.7499	-56.8785
-16.7	-61.0833
-15.7952	-47.81
-15.7937	-47.8098
-15.7739	-47.8333
-15.7605	-47.8431
-15.7525	-47.8673
-15.7525	-47.8673
-15.7524	-47.8674
-15.7501	-47.8695
-15.7498	-47.8698
-15.7498	-47.8698
-15.7332	-47.8851
-12.9663	-38.412
-12.9609	-38.4126
-12.5345	-69.0472
-11.8898	-71.4082
-10.1253	124.259
-10	-55
-10	-55
-9.5	147.251
-9.41917	125.139
-9.39513	125.157
-9.1776	125.529
-8.95426	-35.1742
-8.95411	-35.1771
-8.7526	115.167
-8.70109	115.264
-8.5663	115.259
-8.5478	115.208
-8.54762	115.208
-8.49022	115.291
-8.41747	115.351
-8.30016	115.178
-8.28384	-35.9737
-7.92998	110.358
-7.92272	110.344
-7.9004	110.342
-7.89263	110.552
-7.84524	110.166
-7.84264	110.326
-7.83724	110.412
-7.82437	110.458
-7.77036	110.489
-7.75027	110.339
-7.72545	109.959
-7.71712	110.348
-7.71554	111.465
-7.6983	109.024
-7.69437	110.566
-7.67269	109.982
-7.65897	110.398
-7.61606	110.415
-7.61594	110.416
-7.61594	110.416
-7.60029	110.296
-7.55155	110.284
-7.53748	110.327
-7.52725	-38.4947
-7.51704	112.052
-7.51358	110.732
-7.50569	108.892
-7.48486	112.412
-7.4284	109.287
-7.42798	109.207
-7.41424	108.17
-7.37064	108.243
-7.36074	108.191
-7.35389	108.225
-7.348	108.27
-7.33766	108.191
-7.33609	108.19
-7.33174	108.245
-7.2611	110.399
-7.24916	112.519
-7.16269	112.631
-6.94228	108.527
-6.91028	107.481
-6.80405	111.116
-6.79209	107.64
-6.74496	111.046
-6.73712	107.008
-6.73709	107.008
-6.71992	108.559
-6.70343	-38.9591
-6.68275	-38.9609
-6.68275	-38.9609
-6.68066	108.56
-6.67953	-38.9446
-6.60064	106.798
-6.59952	106.797
-6.55532	106.718
-6.4916	106.851
-6.4912	106.851
-6.4908	106.852
-6.4905	106.851
-6.4903	106.852
-6.4901	106.851
-6.39618	-39.2592
-6.3707	106.825
-6.3707	106.825
-6.36709	-39.3213
-6.3665	106.825
-6.3665	106.825
-6.3665	106.825
-6.3654	106.825
-6.36246	106.826
-6.3613	106.827
-6.36116	-39.3083
-6.3608	106.827
-6.254	107.751
-6.0708	106.647
-5.56846	105.085
-5.19583	-37.3133
-4.89368	-80.7009
-4.88364	-80.6918
-4.04491	-59.0792
-3.81711	-73.3223
-3.74866	-38.4857
-3.74844	-38.4859
-3.43543	114.726
-3.3235	-71.8608
-3.21964	-60.1279
-3.06723	-64.8464
-2.53896	-54.979
-2.49424	-54.9587
-2.47322	-54.6318
-2.46209	-54.6543
-2.43237	-54.749
-2.4276	-54.7502
-2.42554	-79.6301
-2.42424	-79.6609
-2.42106	-54.7443
-2.4192	-54.7338
-2.41919	-54.7339
-2.41815	-54.7343
-2.41707	-54.7346
-2.41643	-54.7354
-2.40498	-54.7972
-2.39623	-54.7311
-2.3954	-54.7331
-2.38287	-54.7346
-2.33125	-55.058
-2.27769	-79.6395
-1.56114	103.677
-1.46751	-77.9859
-0.999937	-77.8093
-0.666031	37.3699
-0.472094	-76.4591
-0.2948	100.161
-0.2904	100.152
-0.2807	100.159
-0.2556	100.196
0.0791452	-77.0089
0.0795275	-77.0092
0.108651	-76.9154
0.111991	-76.9121
0.119185	-76.9053
0.15592	113.965
1.28261	103.869
1.32013	103.816
1.32013	103.816
1.32928	103.727
1.33283	103.728
1.33436	103.932
1.33436	103.932
1.33436	103.932
1.33436	103.932
1.33436	103.932
1.33577	103.942
1.33825	103.726
1.35283	103.81
1.35641	103.771
1.36494	103.836
1.36609	103.753
1.37389	103.825
1.39251	103.983
1.40403	103.849
1.40704	103.829
1.4071	103.829
1.40844	103.924
1.4174	103.732
1.41765	103.728
1.42117	103.722
1.42478	103.838
1.44608	103.729
1.44634	103.725
1.54322	98.9476
1.84381	102.936
2.09147	99.8177
2.8595	101.63
2.93208	101.704
2.93208	101.704
2.93208	101.704
2.93208	101.704
2.93339	101.705
2.93372	101.703
2.93386	101.705
2.96442	101.695
2.96442	101.695
2.96461	101.695
3.03679	101.726
3.08189	101.597
3.09059	101.517
3.09955	101.721
3.10219	101.626
3.10223	101.626
3.10245	101.627
3.10267	101.627
3.10358	101.625
3.10358	101.625
3.10499	101.649
3.10602	101.649
3.14889	101.51
3.15951	101.581
3.63969	98.7569
3.7705	101.007
3.7706	-76.2413
3.90256	-76.45
3.90256	-76.45
3.91242	103.366
4.91565	114.95
5.06686	100.396
5.34972	100.215
5.56998	100.386
5.98517	116.093
6.37215	99.7603
7.00672	100.498
7.00697	100.498
7.00709	100.499
7.00731	100.498
7.00733	100.498
7.0081	100.497
7.07574	125.524
7.08396	125.523
7.0879	125.559
7.28801	125.675
7.47689	125.833
7.5912	100.295
8.05667	-81.2326
8.07459	98.7552
8.69236	106.605
8.74974	98.2554
9.47707	100.067
9.48553	99.9834
9.57249	100.08
9.7157	76.3191
9.7837	100.004
10.3456	107.074
10.7085	105.991
10.7212	106.73
10.724	106.716
10.724	106.716
10.7622	106.726
10.8156	106.871
10.8164	106.871
10.8814	121.974
10.9786	-72.7675
11.0333	-72.713
11.1028	-72.6904
11.105	107.408
11.105	107.408
11.1131	-72.5851
11.1161	-72.6801
11.1385	-72.5911
11.1426	-72.5874
11.1736	-72.559
11.5797	104.924
11.951	108.45
12.842	100.002
12.9938	101.442
13.1608	100.064
13.2614	100.927
13.4347	123.407
13.4349	123.406
13.4635	144.76
13.5897	100.353
13.5897	100.353
13.6965	100.569
13.7325	100.555
13.7508	100.794
13.7941	100.192
13.8028	100.378
13.8104	100.553
13.8107	100.554
13.8498	100.569
13.914	100.467
13.9422	100.439
13.9629	121.652
14.0082	121.097
14.0104	121.094
14.0716	100.598
14.0758	100.596
14.0791	100.614
14.0804	100.613
14.1697	100.274
14.2378	121.506
14.3531	100.563
14.355	100.562
14.3568	100.565
14.9006	101.811
14.918	101.796
15.0531	101.961
15.6935	100.127
15.7103	100.209
15.8799	108.344
15.8828	108.34
15.8928	108.333
16.4323	121.114
16.4674	107.589
16.47	107.575
16.9961	-89.6972
16.9985	-89.7009
16.9986	-89.7008
16.9993	-89.7014
16.9993	-89.7013
17.3433	102.971
17.5907	100.149
17.7306	83.2333
17.971	102.998
18.0362	102.373
18.1957	-92.9666
18.2528	109.512
18.299	109.457
18.299	109.457
18.299	109.457
18.4286	-70.2561
18.5237	-69.926
18.5865	99.2649
18.6326	-99.1548
18.7374	73.4101
18.7463	-99.3316
18.9254	98.9316
18.9841	99.1256
18.9847	109.052
19.054	108.743
19.1836	-96.5395
19.2092	-104.539
19.2181	110.506
19.2912	-96.4292
19.3679	98.9767
19.717	109.292
19.7429	-70.4191
19.94	110.196
20.0168	110.241
20.211	105.939
20.218	105.942
20.2296	105.924
20.2376	105.942
20.3655	105.886
20.3691	105.887
20.5863	96.9102
20.6456	-87.6319
20.7156	102.097
20.72	-97.8943
20.7265	-97.8527
20.75	-105.269
21.0481	105.837
21.6931	82.5616
21.7862	-105.129
21.9274	101.255
21.9281	101.254
21.9288	101.255
21.9356	108.634
21.9971	104.845
22.0256	121.552
22.0791	121.529
22.1894	120.889
22.2661	113.995
22.2663	113.993
22.2667	113.993
22.2681	113.995
22.2906	113.948
22.3436	114.237
22.4145	114.05
22.4206	114.081
22.4294	114.068
22.4299	114.083
22.4315	114.086
22.4327	114.118
22.4329	114.118
22.433	114.118
22.4336	114.061
22.4339	114.061
22.4348	114.116
22.445	114.137
22.4451	114.139
22.4452	114.137
22.4454	114.137
22.4454	114.138
22.4455	114.137
22.4455	114.138
22.4503	114.051
22.4544	114.039
22.4606	114.004
22.4652	114.017
22.4713	114.006
22.4717	114.042
22.4844	114.119
22.4873	114.04
22.4873	114.04
22.4874	114.041
22.4876	114.041
22.4876	114.041
22.4876	114.041
22.4876	114.041
22.4877	114.041
22.4877	114.041
22.4878	114.041
22.4878	114.041
22.4881	114.041
22.489	114.042
22.4894	114.042
22.4907	114.118
22.4933	114.107
22.4953	114.056
22.4973	114.04
22.4981	114.039
22.4993	114.118
22.5	114.117
22.505	114.114
22.505	114.114
22.505	114.114
22.505	114.114
22.5059	114.117
22.5062	114.112
22.5065	114.112
22.5078	114.113
22.5083	114.115
22.5087	114.116
22.5088	114.114
22.5088	114.113
22.509	114.113
22.5128	114.066
22.5136	114.113
22.5189	114.216
22.5201	114.097
22.5237	114.221
22.5238	114.221
22.5244	114.095
22.5306	114.129
22.5334	113.999
22.5339	113.999
22.5345	114
22.5372	114.142
22.5426	113.998
22.5445	114.005
22.5446	114.005
22.5446	114.005
22.5447	114.005
22.5447	114.005
22.5472	113.917
22.5536	114.059
22.5536	114.059
22.5578	113.947
22.5587	113.948
22.5622	114.12
22.5719	120.368
22.5721	120.368
22.5721	120.368
22.5783	120.347
22.592	120.356
22.6114	120.264
22.6336	114.413
22.6374	114.403
22.6465	120.274
22.6488	120.273
22.6499	120.429
22.651	120.352
22.651	120.352
22.6519	120.351
22.6529	120.351
22.6533	120.351
22.6533	120.351
22.6563	120.286
22.6789	120.294
22.6804	120.292
22.6811	120.297
22.6876	114.057
22.6891	120.327
22.6891	120.327
22.6893	120.328
22.6956	121.072
22.6957	121.072
22.7102	120.507
22.7196	120.515
22.7207	120.515
22.7263	114.237
22.7576	121.166
22.7616	120.279
22.797	120.292
22.7971	120.292
22.818	120.253
22.8453	120.295
22.846	-82.944
22.8555	120.54
22.8575	120.541
22.87	113.48
22.87	113.48
22.87	113.48
22.87	113.48
22.87	113.48
22.87	113.48
22.87	113.48
22.87	113.48
22.87	113.48
22.87	113.48
22.87	113.48
22.87	113.48
22.87	113.48
22.87	113.48
22.87	113.48
22.87	113.48
22.87	113.48
22.87	113.48
22.87	113.48
22.87	113.48
22.87	113.48
22.87	113.48
22.87	113.48
22.87	113.48
22.87	113.48
22.87	113.48
22.87	113.48
22.87	113.48
22.87	113.48
22.87	113.48
22.87	113.48
22.87	113.48
22.87	113.48
22.87	113.48
22.87	113.48
22.87	113.48
22.87	113.48
22.87	113.48
22.87	113.48
22.87	113.48
22.87	113.48
22.87	113.48
22.87	113.48
22.87	113.48
22.87	113.48
22.87	113.48
22.87	113.48
22.87	113.48
22.87	113.48
22.8762	114.158
22.8762	114.158
22.8762	114.158
22.8964	113.89
22.8964	120.576
22.9103	120.556
22.9129	120.553
22.9328	113.884
22.9334	120.225
22.9464	113.194
22.9566	113.316
23.0207	113.752
23.0207	113.752
23.0291	120.2
23.0291	120.2
23.0405	113.372
23.0405	113.372
23.0405	113.372
23.0405	113.372
23.0542	120.245
23.0668	121.172
23.0785	120.125
23.08	120.5
23.08	120.5
23.09	120.51
23.09	120.51
23.09	120.51
23.0904	120.1
23.0941	120.296
23.0951	121.216
23.0981	120.099
23.11	120.48
23.11	120.48
23.11	120.48
23.11	120.48
23.11	120.2
23.11	120.2
23.11	120.2
23.11	120.2
23.12	120.38
23.12	120.38
23.12	120.38
23.12	120.38
23.12	120.38
23.12	120.38
23.12	120.38
23.1544	121.286
23.1544	121.286
23.1544	121.286
23.1544	121.286
23.1544	121.286
23.1544	121.286
23.1544	121.286
23.1544	121.286
23.1544	121.286
23.1544	121.286
23.1544	121.286
23.1544	121.286
23.1544	121.286
23.1544	121.286
23.1544	121.286
23.1544	121.286
23.1544	121.286
23.1544	121.286
23.1544	121.286
23.1544	121.286
23.1544	121.286
23.1544	121.286
23.1544	121.286
23.1544	121.286
23.1544	121.286
23.1544	121.286
23.1544	121.286
23.1544	121.286
23.1544	121.286
23.1544	121.286
23.1544	121.286
23.1544	121.286
23.1544	121.286
23.1544	121.286
23.1544	121.286
23.1544	121.286
23.1544	121.286
23.1544	121.286
23.1544	121.286
23.1544	121.286
23.1544	121.286
23.1544	121.286
23.1544	121.286
23.1544	121.286
23.1544	121.286
23.1544	121.286
23.1544	121.286
23.1544	121.286
23.1544	121.286
23.1544	121.286
23.1544	121.286
23.1544	121.286
23.1544	121.286
23.1544	121.286
23.1544	121.286
23.1544	121.286
23.1544	121.286
23.1544	121.286
23.1544	121.286
23.1544	121.286
23.1544	121.286
23.1544	121.286
23.1544	121.286
23.1544	121.286
23.1544	121.286
23.1544	121.286
23.1544	121.286
23.1544	121.286
23.1544	121.286
23.1544	121.286
23.1544	121.286
23.1544	121.286
23.1544	121.286
23.1544	121.286
23.1544	121.286
23.1544	121.286
23.1544	121.286
23.1544	121.286
23.1544	121.286
23.1544	121.286
23.1544	121.286
23.1544	121.286
23.1544	121.286
23.1544	121.286
23.1544	121.286
23.1544	121.286
23.1544	121.286
23.1544	121.286
23.1544	121.286
23.1544	121.286
23.1544	121.286
23.1544	121.286
23.1544	121.286
23.1544	121.286
23.1544	121.286
23.1544	121.286
23.1544	121.286
23.1544	121.286
23.1544	121.286
23.1544	121.286
23.1544	121.286
23.1544	121.286
23.1544	121.286
23.1583	120.347
23.17	120.26
23.17	120.26
23.17	120.26
23.17	120.26
23.17	120.26
23.17	120.26
23.1741	121.248
23.1741	121.248
23.1806	113.359
23.1866	120.268
23.1894	120.269
23.1894	120.269
23.19	120.48
23.19	120.48
23.2179	120.351
23.2983	121.259
23.3053	120.188
23.3336	120.459
23.3826	120.409
23.404	121.217
23.404	121.217
23.404	121.217
23.404	121.217
23.404	121.217
23.404	121.217
23.404	121.217
23.404	121.217
23.404	121.217
23.404	121.217
23.404	121.217
23.404	121.217
23.404	121.217
23.404	121.217
23.404	121.217
23.404	121.217
23.404	121.217
23.404	121.217
23.404	121.217
23.404	121.217
23.404	121.217
23.404	121.217
23.404	121.217
23.404	121.217
23.404	121.217
23.404	121.217
23.404	121.217
23.404	121.217
23.404	121.217
23.404	121.217
23.404	121.217
23.404	121.217
23.404	121.217
23.404	121.217
23.404	121.217
23.404	121.217
23.404	121.217
23.404	121.217
23.404	121.217
23.404	121.217
23.4182	120.3
23.4299	120.485
23.449	121.398
23.4498	121.401
23.4499	121.4
23.4499	121.4
23.4503	121.397
23.4507	121.397
23.4558	121.402
23.4566	120.494
23.4713	120.487
23.4714	120.174
23.4715	120.488
23.4719	120.486
23.4723	120.535
23.4727	120.477
23.4769	120.291
23.4809	120.405
23.484	120.464
23.4841	120.471
23.4858	120.454
23.4859	120.454
23.4864	120.337
23.4969	120.168
23.4997	113.615
23.5017	120.149
23.5109	120.148
23.5138	120.19
23.525	120.205
23.5254	120.205
23.5257	120.551
23.5391	120.224
23.5406	120.196
23.5406	120.196
23.5409	88.6614
23.541	120.225
23.5412	120.226
23.543	120.214
23.5431	120.203
23.5464	120.183
23.5468	120.182
23.5474	120.182
23.5527	119.607
23.5596	120.168
23.56	120.21
23.5623	120.165
23.5657	120.251
23.5664	120.211
23.5693	120.172
23.5778	120.302
23.5782	120.21
23.5786	120.469
23.5841	120.47
23.5852	121.503
23.5921	120.428
23.5942	120.59
23.595	120.597
23.5962	120.455
23.5983	120.315
23.6009	120.489
23.6012	120.369
23.6014	120.279
23.6025	120.28
23.6042	120.337
23.6068	120.694
23.6081	120.459
23.6089	120.46
23.6122	120.163
23.6203	120.26
23.6226	120.242
23.6242	120.258
23.6269	120.307
23.6279	120.236
23.628	120.236
23.6289	120.263
23.6292	120.286
23.6293	120.262
23.6298	120.252
23.6302	120.195
23.6302	120.146
23.6303	120.254
23.6329	120.288
23.6331	120.658
23.6345	120.401
23.6358	120.5
23.6359	120.293
23.6363	120.304
23.6374	120.597
23.6411	120.515
23.6422	120.483
23.6432	120.249
23.6503	120.31
23.6507	120.274
23.6516	120.156
23.6532	120.199
23.6554	120.507
23.6557	120.508
23.6566	120.161
23.658	120.514
23.66	120.503
23.6614	120.503
23.662	120.502
23.6622	120.208
23.6622	120.502
23.6622	120.502
23.6631	120.154
23.6648	120.531
23.6677	120.546
23.6708	121.429
23.6719	120.481
23.6742	120.482
23.6747	120.446
23.6749	120.446
23.6771	120.471
23.6771	120.471
23.6771	120.471
23.6832	120.567
23.6905	120.568
23.6918	120.314
23.6932	120.358
23.6933	120.44
23.6974	120.627
23.6987	120.54
23.6992	120.526
23.7024	120.548
23.7024	120.548
23.7036	120.433
23.704	120.355
23.7086	120.505
23.7139	120.336
23.7153	120.528
23.7158	120.414
23.7188	120.343
23.7197	120.338
23.7203	120.338
23.7213	120.312
23.7222	120.308
23.7224	120.308
23.7251	120.625
23.7265	120.624
23.7265	120.624
23.729	120.364
23.7318	121.49
23.7319	120.409
23.7321	120.487
23.7329	120.487
23.7352	120.356
23.7378	120.347
23.739	120.223
23.74	120.398
23.742	120.411
23.7423	120.352
23.7511	120.408
23.7522	120.431
23.7581	120.252
23.7583	120.252
23.7592	120.383
23.7594	120.383
23.7613	120.463
23.763	121.456
23.7818	120.524
23.7822	120.416
23.7853	120.779
23.7907	120.47
23.7931	120.317
23.7946	120.47
23.7948	120.466
23.795	120.47
23.7956	120.448
23.7991	120.427
23.8046	120.365
23.806	120.427
23.806	120.426
23.8243	120.26
23.8253	120.276
23.8261	120.256
23.8267	120.801
23.8307	120.526
23.8423	120.692
23.8583	120.863
23.8583	120.482
23.8593	121.56
23.8593	121.56
23.8593	121.56
23.8674	120.91
23.8773	120.466
23.8797	121.542
23.8797	121.542
23.8797	121.542
23.8914	121.523
23.8918	121.577
23.8965	121.526
23.8991	121.54
23.9	120.912
23.9127	121.06
23.9256	120.584
23.956	121.552
23.9609	120.665
23.9611	120.665
23.9732	121.584
23.9732	121.584
23.9788	121.598
23.9816	121.471
23.9928	120.738
23.9947	120.746
24	121
24	88
24	88
24.0266	120.473
24.0474	120.668
24.0788	120.653
24.1724	120.785
24.173	120.785
24.1806	120.629
24.1809	120.628
24.1814	120.629
24.1817	120.63
24.1893	120.63
24.207	120.594
24.2071	120.594
24.2071	120.594
24.2072	120.594
24.2076	120.597
24.2129	120.723
24.2143	120.56
24.2305	120.656
24.2306	120.656
24.2367	120.667
24.2685	120.559
24.3123	120.551
24.315	120.731
24.315	120.731
24.3151	120.731
24.3359	120.634
24.3359	120.636
24.336	120.636
24.3373	120.642
24.3383	120.625
24.3388	120.624
24.3428	120.763
24.3529	120.569
24.4005	124.163
24.4383	118.104
24.4407	120.626
24.4552	118.398
24.4567	118.397
24.4604	121.812
24.4613	121.821
24.4886	120.668
24.5	121.8
24.5	121.8
24.5	121.8
24.5	121.8
24.5	121.8
24.5168	120.727
24.5224	120.734
24.5665	120.835
24.5942	121.853
24.5942	121.853
24.5942	121.853
24.5942	121.853
24.5942	121.853
24.5942	121.853
24.5942	121.853
24.5942	121.853
24.5942	121.853
24.5942	121.853
24.5942	121.853
24.5942	121.853
24.5942	121.853
24.5942	121.853
24.5942	121.853
24.5942	121.853
24.5942	121.853
24.596	120.728
24.596	120.728
24.5973	121.851
24.6014	121.841
24.6014	121.841
24.6218	120.787
24.6261	121.796
24.6273	121.795
24.6274	121.795
24.6275	121.795
24.6275	121.795
24.6337	121.79
24.6412	121.7
24.6437	121.597
24.6437	121.597
24.644	121.751
24.644	121.751
24.6444	121.729
24.649	121.798
24.6497	121.813
24.6503	121.813
24.6504	121.813
24.6506	121.822
24.6513	121.823
24.6514	121.823
24.6534	121.743
24.6541	121.822
24.6542	121.819
24.6555	121.822
24.656	121.815
24.6561	121.822
24.6566	121.822
24.6572	121.803
24.6581	121.82
24.6582	121.821
24.6582	121.821
24.6584	121.814
24.6585	121.822
24.6599	121.816
24.6608	121.816
24.6617	121.814
24.6618	121.819
24.6627	121.75
24.6632	121.818
24.6632	121.818
24.6632	121.818
24.6632	121.818
24.6635	121.764
24.6645	121.812
24.6645	121.812
24.6648	121.819
24.6648	121.819
24.6652	121.813
24.6658	121.819
24.6662	121.819
24.6662	121.813
24.6664	121.819
24.667	120.844
24.6685	121.809
24.6686	121.809
24.6705	121.8
24.6717	121.804
24.6733	121.754
24.6759	121.796
24.677	121.78
24.677	121.78
24.6777	121.73
24.6778	121.781
24.6782	121.1
24.6801	121.732
24.6803	121.748
24.682	121.713
24.6829	121.773
24.6839	121.697
24.6855	121.754
24.6855	121.754
24.6859	121.798
24.6862	121.719
24.6862	121.719
24.6888	121.805
24.6888	121.805
24.6888	121.805
24.6888	121.805
24.6888	121.805
24.6888	121.805
24.6888	121.805
24.6888	121.805
24.6888	121.805
24.6888	121.805
24.6888	121.805
24.6888	121.805
24.6888	121.805
24.6888	121.805
24.6888	121.805
24.6888	121.805
24.6888	121.805
24.6888	121.805
24.6888	121.805
24.6888	121.805
24.6888	121.805
24.6888	121.805
24.6888	121.805
24.6888	121.805
24.6888	121.805
24.6888	121.805
24.6888	121.805
24.6888	121.805
24.6888	121.805
24.6888	121.805
24.6888	121.805
24.6888	121.805
24.6888	121.805
24.6888	121.805
24.6888	121.805
24.6888	121.805
24.6888	121.805
24.6888	121.805
24.6888	121.805
24.6888	121.805
24.6888	121.805
24.6888	121.805
24.6888	121.805
24.6888	121.805
24.6888	121.805
24.6888	121.805
24.6888	121.805
24.6888	121.805
24.6888	121.805
24.6888	121.805
24.6888	121.805
24.6888	121.805
24.6888	121.805
24.6888	121.805
24.6888	121.805
24.6888	121.805
24.6888	121.805
24.6888	121.805
24.6888	121.805
24.6888	121.805
24.6888	121.805
24.6888	121.805
24.6888	121.805
24.6888	121.805
24.6888	121.805
24.6888	121.805
24.6888	121.805
24.6888	121.805
24.6888	121.805
24.6888	121.805
24.6888	121.805
24.6888	121.805
24.6888	121.805
24.6888	121.805
24.6888	121.805
24.6888	121.805
24.6888	121.805
24.691	121.809
24.6962	121.789
24.6964	121.101
24.6973	121.097
24.6981	121.825
24.6982	121.824
24.6982	121.824
24.7	120.859
24.7002	121.741
24.7019	121.822
24.7019	121.822
24.702	121.742
24.702	121.742
24.7041	121.156
24.7043	121.157
24.7044	121.157
24.7047	121.157
24.7048	121.157
24.7071	121.157
24.7073	121.157
24.7079	121.827
24.7079	121.819
24.7079	121.819
24.7079	121.819
24.7105	121.68
24.7105	121.68
24.7109	121.812
24.7125	121.698
24.7136	121.696
24.7136	121.696
24.7147	121.682
24.7147	121.743
24.7153	121.682
24.7179	121.824
24.7179	121.824
24.7181	121.743
24.7181	121.706
24.7181	121.706
24.7181	121.706
24.7181	121.706
24.7182	121.706
24.7182	121.706
24.7184	121.705
24.7185	121.705
24.719	121.706
24.7194	121.807
24.7197	121.818
24.7199	121.718
24.7199	121.718
24.7209	121.703
24.7211	121.715
24.7211	121.716
24.7211	121.716
24.7211	121.688
24.7214	121.825
24.7214	121.825
24.7215	121.687
24.7219	121.725
24.7227	121.812
24.7227	121.812
24.7229	121.809
24.7231	121.724
24.7232	121.724
24.7232	121.724
24.7232	121.724
24.7233	121.811
24.7233	121.811
24.7233	121.811
24.7235	121.684
24.7237	121.706
24.7238	121.706
24.724	121.811
24.724	121.811
24.724	121.811
24.724	121.811
24.724	121.811
24.7244	121.815
24.7244	121.815
24.7244	121.815
24.7244	121.815
24.7244	121.815
24.7244	121.815
24.7244	121.815
24.7245	121.814
24.7246	121.81
24.7248	121.711
24.7249	121.707
24.7252	121.688
24.7253	121.81
24.7253	121.811
24.7253	121.813
24.7253	121.813
24.7253	121.813
24.7254	121.812
24.7254	121.812
24.7254	121.812
24.7254	121.812
24.7254	121.812
24.7254	121.812
24.7254	121.812
24.7265	121.809
24.7265	121.809
24.7265	121.809
24.7265	121.809
24.7265	121.809
24.7265	121.809
24.7265	121.809
24.7265	121.809
24.7268	121.811
24.7268	121.811
24.7268	121.811
24.7268	121.811
24.7268	121.811
24.7268	121.811
24.7268	121.811
24.7268	121.811
24.7272	121.719
24.7272	121.81
24.7272	121.81
24.7272	121.81
24.7272	121.81
24.7272	121.81
24.7274	121.81
24.7274	121.81
24.7274	121.81
24.7277	121.706
24.728	121.811
24.728	121.811
24.728	121.719
24.7281	121.811
24.7282	121.811
24.7282	121.811
24.7282	121.811
24.7282	121.811
24.7282	121.811
24.7282	121.811
24.7287	121.808
24.7287	121.808
24.7287	121.808
24.7288	121.808
24.729	121.81
24.729	121.81
24.7291	121.809
24.7294	121.807
24.7295	121.807
24.7298	121.806
24.73	121.699
24.73	121.699
24.7301	121.699
24.7301	121.699
24.7301	121.699
24.7301	121.699
24.7302	121.699
24.7302	121.81
24.7305	121.809
24.7305	121.809
24.7305	121.809
24.7305	121.809
24.7305	121.809
24.7305	121.809
24.7305	121.809
24.7306	121.805
24.7309	121.699
24.731	121.804
24.731	121.804
24.731	118.142
24.7312	121.809
24.7312	121.809
24.7312	121.809
24.7312	121.809
24.7312	121.809
24.7313	121.806
24.7313	121.806
24.7313	121.806
24.7313	121.806
24.7313	121.806
24.7313	121.806
24.7316	121.809
24.7316	121.809
24.7319	121.808
24.7319	121.808
24.7319	121.808
24.7319	121.808
24.7319	121.808
24.7319	121.808
24.7319	121.808
24.7319	121.808
24.7319	121.808
24.732	121.81
24.732	121.81
24.732	121.81
24.7321	121.809
24.7321	121.809
24.7321	121.809
24.7321	121.809
24.7321	121.809
24.7321	121.809
24.7321	121.809
24.7321	121.809
24.7321	121.809
24.7321	121.809
24.7321	121.809
24.7339	121.805
24.7339	121.805
24.7349	121.739
24.7374	121.745
24.7375	121.739
24.7381	121.745
24.7381	121.745
24.7381	121.745
24.7381	121.745
24.7381	121.663
24.7382	121.745
24.7382	121.746
24.7382	121.746
24.7382	121.746
24.7396	121.727
24.7399	121.766
24.7404	121.746
24.7404	121.746
24.7405	110.58
24.7405	121.732
24.7413	121.688
24.7414	121.689
24.7416	121.689
24.7422	121.742
24.7427	121.811
24.7429	121.776
24.7431	121.793
24.7435	121.734
24.7437	121.691
24.7442	121.69
24.7443	121.74
24.7448	121.734
24.745	121.721
24.745	121.721
24.7458	121.703
24.7463	121.702
24.7476	121.084
24.7492	121.069
24.7494	121.639
24.7498	121.767
24.753	121.733
24.753	121.733
24.7537	121.635
24.7538	121.635
24.7548	121.697
24.756	121.698
24.7561	121.698
24.7561	121.698
24.7561	121.698
24.7561	121.697
24.7562	121.649
24.7563	121.698
24.7569	121.694
24.7582	121.717
24.7582	121.716
24.7583	121.716
24.7583	121.716
24.7588	121.686
24.7595	121.708
24.7595	121.789
24.7595	121.789
24.763	121.74
24.7644	121.746
24.7644	121.746
24.7652	120.904
24.7652	120.904
24.7672	121.768
24.7672	121.768
24.7683	121.741
24.7683	121.741
24.7696	121.799
24.7696	121.799
24.7696	121.799
24.7696	121.799
24.7696	121.799
24.7696	121.799
24.7696	121.799
24.7696	121.799
24.7696	121.799
24.7696	121.799
24.7696	121.799
24.7696	121.799
24.7696	121.799
24.7696	121.799
24.7696	121.799
24.7696	121.799
24.7696	121.799
24.7696	121.799
24.7696	121.799
24.7696	121.799
24.7696	121.799
24.7696	121.799
24.7696	121.799
24.7696	121.799
24.7696	121.799
24.7696	121.799
24.7696	121.799
24.7696	121.799
24.7696	121.799
24.7696	121.799
24.7696	121.799
24.7696	121.799
24.7696	121.799
24.7696	121.799
24.7696	121.799
24.7696	121.799
24.7696	121.799
24.7696	121.799
24.7696	121.799
24.7696	121.799
24.7696	121.799
24.7696	121.799
24.7696	121.799
24.7696	121.799
24.7696	121.799
24.7696	121.799
24.7696	121.799
24.7696	121.799
24.7696	121.799
24.7696	121.799
24.7696	121.799
24.7696	121.799
24.7696	121.799
24.7696	121.799
24.7696	121.799
24.7696	121.799
24.7696	121.799
24.7696	121.799
24.7696	121.799
24.7696	121.799
24.7696	121.799
24.7698	121.778
24.7743	121.699
24.7807	121.695
24.7871	110.427
24.7872	121.037
24.7884	121.745
24.7926	121.74
24.7936	121.742
24.7938	121.739
24.7938	121.739
24.7938	121.739
24.794	120.944
24.7947	120.916
24.796	121.742
24.7963	121.743
24.7966	121.741
24.7969	121.738
24.803	120.993
24.8043	121.812
24.8055	121.786
24.8055	121.786
24.8055	121.786
24.8102	121.047
24.8149	121.3
24.815	121.3
24.8151	121.3
24.8154	121.003
24.8158	121.047
24.8167	121.046
24.8183	121.813
24.8183	121.813
24.8183	121.813
24.8205	121.043
24.8212	121.04
24.8248	120.998
24.8267	121.766
24.8267	121.766
24.8345	121.187
24.8367	121.256
24.837	121.775
24.8493	121.198
24.877	121.195
24.8812	121.297
24.8926	121.283
24.9057	121.267
24.9189	121.195
24.9207	110.523
24.9329	121.554
24.9456	121.311
24.9507	121.188
24.9521	121.229
24.9611	121.269
24.9653	121.007
24.9729	121.421
24.9762	121.19
24.9768	121.52
24.9798	121.209
24.9972	121.822
25	121.9
25.0054	121.414
25.015	121.511
25.015	121.511
25.0152	121.34
25.0156	121.924
25.017	121.342
25.0172	121.342
25.0179	121.924
25.0226	121.924
25.0239	121.82
25.0239	121.82
25.028	121.225
25.031	121.535
25.0317	121.203
25.032	121.457
25.0321	121.51
25.0328	121.581
25.0334	121.58
25.0341	121.58
25.0398	121.236
25.0463	121.479
25.0516	121.59
25.0529	121.638
25.0565	121.563
25.0584	121.48
25.062	121.662
25.066	121.65
25.068	121.665
25.0733	121.567
25.0823	121.202
25.0833	121.668
25.0835	121.667
25.0846	121.663
25.0853	121.548
25.0886	121.45
[truncated: 2,879 more rows]
