# Supplementary material
Source: MDPI journal article supplement (https://www.mdpi.com/2073-4395/14/4/650)
Supplement: s1 [file s1 › Supplementary 2.xls]

## Sheet: pseudo_absences_data
latitude	longitude
82.6875	-43.1042
82.5625	-42.9792
82.0625	-88.3125
81.8125	-41.6875
81.6458	-41.0208
80.8542	-73.3125
80.8542	-44.5208
80.7292	94.8958
80.4792	-40.7292
80.1458	-77.8958
80.1042	-65.6875
79.3542	-31.1042
78.5208	-39.1875
78.2292	-78.6042
78.1458	-50.2708
77.4375	-44.6875
77.3542	16.0208
77.2292	-50.9792
76.2292	-24.9792
76.1875	-50.3542
76.0625	-20.1875
75.9792	-28.3958
75.8958	-36.4792
75.6458	-112.771
75.6042	-41.3125
75.1875	-86.6458
75.0625	-84.1042
74.8958	97.2292
74.5625	103.479
74.2708	106.854
74.0208	-30.5625
73.6458	91.8542
73.5208	-93.6042
73.4792	82.8958
73.4375	-120.812
73.3542	-42.8958
72.6042	94.5208
72.5208	90.8542
71.9375	-30.3958
71.8958	126.729
71.8542	-44.8542
71.7708	108.062
70.9792	140.438
70.9792	156.021
70.8125	96.1875
70.7708	-106.396
70.6042	118.146
70.4375	58.8958
70.3125	121.188
70.2708	107.646
70.1875	84.9375
70.0625	-50.0625
69.8542	109.729
69.8125	-70.4375
69.8125	-42.1458
69.7292	78.5625
69.7292	132.271
69.5625	31.3958
69.4792	-98.2708
69.3958	153.021
69.2708	-129.562
69.0625	157.062
69.0625	176.938
69.0208	-147.354
69.0208	156.521
68.8958	94.0208
68.8542	91.6042
68.7708	-68.6458
68.7292	65.1458
68.6875	-141.938
68.6042	-146.562
68.6042	-35.9375
68.4792	121.146
68.2708	-82.6042
68.2708	-38.6042
68.2708	140.146
68.2292	-42.3542
68.1458	115.854
68.1042	-125.646
68.0625	-72.7708
68.0208	-93.6458
68.0208	53.0208
67.9375	27.6458
67.8958	-163.604
67.7292	92.6458
67.6875	-34.3125
67.6875	138.938
67.6042	-130.771
67.6042	-71.5625
67.5625	56.8958
67.5208	-98.1875
67.5208	124.646
67.4792	146.521
67.3542	-124.979
67.3125	-116.812
67.2708	-133.438
67.2292	103.062
67.1042	-114.229
67.1042	67.9375
67.1042	132.521
67.0625	120.938
66.8125	-158.271
66.8125	-147.896
66.6458	-49.4375
66.5625	98.9792
66.5208	-100.312
66.5208	172.229
66.4792	-157.104
66.3958	-93.0625
66.3958	69.3958
66.3958	81.6458
66.3958	176.771
66.3542	-62.4792
66.3542	160.354
66.3125	79.4792
66.2708	130.729
66.1875	85.1875
66.1042	-170.938
66.1042	-109.979
65.9792	15.8125
65.9375	-69.9792
65.8542	-129.354
65.8125	-147.312
65.7708	-36.8958
65.7292	-109.229
65.7292	-92.5208
65.7292	-41.2292
65.6875	73.7708
65.6042	64.9792
65.5625	-17.3125
65.5625	101.229
65.3958	-42.3542
65.3958	49.6042
65.2708	34.3125
65.2292	27.4792
65.1458	-46.5208
65.0625	-99.5208
65.0625	48.1458
64.9375	42.0208
64.8958	136.104
64.8125	-84.2292
64.8125	-45.3125
64.8125	105.312
64.7708	-149.396
64.7292	144.604
64.6458	-136.604
64.6458	161.021
64.6042	109.271
64.6042	172.146
64.4792	143.479
64.4792	155.688
64.4375	-126.312
64.4375	15.7708
64.3958	46.3542
64.3958	67.1042
64.3542	49.9375
64.3542	174.396
64.3125	-144.896
64.3125	-49.8958
64.2292	150.688
64.1875	124.896
63.9375	16.7292
63.8958	82.3958
63.7708	-156.771
63.7292	-157.562
63.7292	69.3125
63.5625	-160.188
63.5625	34.7292
63.5208	-119.438
63.4375	-116.229
63.3542	12.5625
63.3125	125.271
63.2292	145.062
63.1875	-50.2708
63.0625	95.3958
63.0208	159.771
62.8958	-69.0208
62.8958	89.5625
62.8125	-162.271
62.8125	-93.7708
62.7708	93.4792
62.6875	150.354
62.6458	-113.271
62.6458	46.1875
62.5208	-134.688
62.4792	143.896
62.3542	63.7292
62.3542	149.021
62.1875	110.021
62.1458	152.562
61.6875	-48.3125
61.3958	-140.771
61.3542	-165.021
61.3542	60.1458
61.3542	148.938
61.3125	91.6458
61.1458	-141.021
61.0625	-124.438
60.7708	10.5625
60.6042	91.3958
60.5625	49.6458
60.5208	-111.188
60.5208	45.5625
60.3958	77.9375
60.3542	71.8125
60.3542	162.354
60.3125	-161.729
60.2708	87.8542
60.1875	-131.896
60.1875	41.1042
59.9792	-126.854
59.9792	-121.896
59.9792	153.938
59.9375	112.854
59.8542	45.4375
59.8125	61.4792
59.7708	38.2708
59.6042	-95.0208
59.4792	-134.771
59.4792	74.7292
59.4375	-100.396
59.4375	28.8542
59.3958	-105.979
59.3958	43.7292
59.3958	160.854
59.3542	107.938
59.3125	37.6458
59.2708	-105.646
59.1042	72.2292
58.8958	-154.979
58.8125	128.729
58.4375	62.1042
58.3958	-97.1458
58.3542	25.4375
58.3542	100.271
58.2708	111.854
58.1875	-97.0625
58.1042	26.4792
58.0625	15.6875
58.0208	68.3125
58.0208	95.1458
57.9375	79.9792
57.8958	-64.0208
57.8542	-101.188
57.8125	-102.271
57.7708	-75.6458
57.7708	160.979
57.6458	-64.4792
57.6458	161.521
57.6042	-69.1042
57.6042	-3.47917
57.5625	56.4375
57.5208	25.3125
57.5208	76.9375
57.3125	79.3125
57.1875	73.2292
57.1875	79.5208
57.1458	112.229
57.0625	134.062
57.0208	74.4792
57.0208	136.688
56.8125	-99.5208
56.7708	131.854
56.6458	127.646
56.6042	-65.1042
56.5625	-106.229
56.5208	-134.979
56.5208	-74.9792
56.4375	-69.8125
56.3958	120.271
56.3125	86.6042
56.1458	89.2708
56.0625	21.6875
55.9792	54.6042
55.8125	89.0208
55.6458	-121.354
55.6458	157.271
55.3542	35.5208
55.3125	57.8542
55.2708	-102.188
55.2708	-84.3542
55.2708	92.8958
55.2708	108.854
55.1875	-123.938
55.1875	-69.2708
55.1458	-125.729
55.1458	53.8958
55.1458	134.062
55.1042	-102.271
55.1042	86.0625
55.0625	158.812
54.9792	107.729
54.7292	29.5208
54.5208	-128.438
54.5208	42.9792
54.1458	29.2708
54.0625	135.354
54.0208	-87.8958
54.0208	99.6042
53.9375	88.8958
53.8958	-82.6458
53.8958	83.9792
53.8542	-89.3542
53.7708	74.3125
53.7292	-132.146
53.7292	111.062
53.3542	-98.4375
53.1875	-108.812
53.1042	6.1875
53.1042	49.8958
53.1042	124.604
53.0208	-67.8958
52.8542	8.39583
52.8125	68.1875
52.7708	-112.521
52.6042	112.354
52.5208	7.22917
52.4792	55.0208
52.3958	95.0208
52.3958	129.062
52.3125	-74.4792
52.3125	22.2708
52.2708	53.3542
52.1875	88.2708
51.9375	32.4792
51.8958	106.812
51.8542	-176.604
51.8542	-88.3542
51.8542	-81.8125
51.6875	-106.812
51.6458	58.3542
51.6458	66.1042
51.6042	68.9792
51.5625	35.8125
51.5208	-112.104
51.5208	-77.1458
51.4792	-77.5625
51.4375	86.8958
51.4375	91.0625
50.9375	54.9375
50.8542	6.39583
50.8125	96.8542
50.6875	-112.438
50.5208	3.27083
50.3542	24.0625
50.3125	121.312
50.2708	45.9375
50.2292	20.2708
50.1875	-89.3542
50.1042	11.7708
50.1042	63.4375
50.0208	-115.354
50.0208	-93.4792
50.0208	129.729
49.9792	112.896
49.8958	-86.6458
49.8125	127.896
49.5208	-75.2292
49.4792	66.7708
49.4375	-90.3125
49.3958	-116.229
49.3542	31.4375
49.2708	101.812
49.0208	28.9792
48.7708	6.39583
48.7292	109.021
48.6875	-77.7708
48.6875	-55.9792
48.6458	-115.146
48.5625	-118.854
48.5625	-81.5625
48.5625	-75.6458
48.3958	56.7708
48.3542	-65.3125
48.3125	47.6458
48.2292	114.104
48.1875	-99.7708
48.0625	-72.9375
47.9792	-90.3125
47.9375	94.4375
47.8125	-93.0208
47.8125	115.938
47.6875	17.1458
47.6458	66.8958
47.6042	-86.1042
47.6042	68.3958
47.5208	-122.771
47.5208	25.5208
47.4792	-73.5208
47.4375	58.4792
47.2292	33.3958
47.1042	-82.5625
47.0625	81.0625
46.9792	113.396
46.9375	23.1458
46.9375	119.271
46.7708	-68.5625
46.5625	-1.1875
46.5208	-116.854
46.4792	122.521
46.4375	11.9792
46.4375	21.0625
46.3958	-89.8125
46.3125	-118.812
46.3125	113.688
46.0625	10.9375
46.0625	97.3125
45.9792	3.02083
45.9375	63.3125
45.8542	136.396
45.8125	-89.8958
45.8125	29.1875
45.7708	68.8542
45.7708	80.6042
45.7292	39.2292
45.7292	81.4375
45.6042	-74.6875
45.4375	105.771
45.3542	58.4375
45.1458	-69.8542
45.1458	125.146
44.8125	16.4792
44.8125	100.521
44.7708	-68.2292
44.6042	-0.854167
44.4792	-74.1875
44.3542	-71.2708
44.3542	58.9375
44.3542	93.6458
44.2292	-75.2708
43.7292	42.6875
43.6458	74.8125
43.5625	43.2292
43.5625	109.062
43.5208	47.1458
43.3542	101.938
43.2708	97.2708
43.1042	-115.479
43.1042	93.7708
43.0625	-92.1042
43.0208	79.8125
42.8958	79.8958
42.8125	24.9792
42.6042	-85.0208
42.6042	-79.7292
42.5625	-3.02083
42.2708	124.938
42.1458	-77.8958
42.1042	55.9792
42.0208	-93.3542
41.9375	-91.6875
41.7708	34.1875
41.7292	60.6875
41.6042	115.229
41.5208	125.354
41.4375	120.479
41.2292	118.646
41.1875	-118.229
41.1875	-92.8125
41.1875	89.1042
41.0625	-96.5208
40.9792	98.8542
40.8958	33.3125
40.8542	-1.97917
40.8125	-75.3542
40.6875	-118.438
40.6042	140.021
40.5625	22.8125
40.4792	16.3542
40.4792	112.062
40.3125	70.0208
40.2708	31.2708
40.2292	30.1458
40.1458	-120.062
40.1042	95.7292
40.0208	67.1042
39.9792	30.4792
39.9375	73.2708
39.8958	-97.7708
39.7708	-93.6042
39.5625	105.396
39.3125	77.3542
39.1458	32.8542
39.0625	75.6458
38.8958	-86.4375
38.6458	112.021
38.6042	22.1875
38.5208	-121.104
38.5208	-86.3542
38.3958	-110.146
38.3125	57.0625
38.2708	-4.9375
38.1042	-5.5625
38.0625	87.8125
37.8958	85.6458
37.8125	-115.688
37.8125	33.3125
37.7708	84.2708
37.7708	140.479
37.5625	-78.4792
37.5625	84.2292
37.5208	-3.9375
37.1875	-99.4792
37.1042	79.3125
36.8958	49.0625
36.8542	63.6042
36.8125	10.0208
36.7708	-81.1042
36.6875	-108.771
36.6458	4.02083
36.3542	-111.396
36.2708	40.8125
36.1042	53.3958
36.1042	101.312
36.0625	76.4792
36.0208	93.1042
35.9792	-98.4375
35.7708	55.4375
35.6458	-92.9792
35.5625	-96.3958
35.3958	85.9792
35.3542	32.9792
35.3125	106.104
35.2292	92.0208
35.1875	-102.146
35.0625	45.7708
35.0208	109.979
34.9792	115.646
34.9375	59.9375
34.8125	-93.4375
34.6042	49.2708
34.4375	87.9375
34.3542	-101.396
34.3542	46.1458
34.3125	119.312
33.8542	90.9375
33.5625	-89.3542
33.4375	103.979
33.3542	-94.6875
33.2708	48.4375
33.2708	96.1042
32.9375	48.5625
32.4792	60.8958
32.4792	131.188
32.3958	49.9792
32.3125	9.6875
32.2708	-113.854
32.2708	89.3542
32.0625	112.271
31.9792	-104.771
31.8542	91.7708
31.7292	5.1875
31.5625	130.521
31.2708	77.8542
31.1042	29.8958
31.1042	89.6458
31.0208	28.5625
31.0208	51.7292
30.8958	14.3958
30.8542	17.0625
30.8542	104.604
30.7292	121.062
30.6458	40.6458
30.6458	43.1458
30.4792	4.3125
30.4375	-2.27083
30.3125	-112.729
30.3125	-99.1458
30.3125	72.7708
30.2292	59.9792
30.1875	118.521
30.1042	-1.35417
30.0625	51.7708
29.9375	-114.604
29.9375	-1.14583
29.8958	-108.146
29.8958	-98.1458
29.8958	22.8125
29.8542	30.3125
29.7708	-8.1875
29.6875	33.6042
29.6875	108.729
29.6042	19.2708
29.4375	-110.312
29.3542	41.2708
29.2708	1.02083
29.2292	32.5625
29.1875	111.604
29.1875	114.604
29.0625	68.1458
29.0625	69.5208
29.0625	72.5208
29.0625	104.812
28.8958	57.8125
28.7708	13.5625
28.6875	62.4375
28.6458	93.3958
28.6042	30.9792
28.6042	91.3125
28.5208	92.4375
28.3125	95.6042
28.3125	96.6875
28.2708	-81.3125
28.2292	27.0625
27.8542	-100.771
27.8125	11.9792
27.8125	117.021
27.7708	74.8958
27.7292	29.5208
27.6875	65.0208
27.5208	20.2292
27.4375	17.1875
27.3958	-102.854
27.3958	-1.0625
27.2708	47.1042
27.2708	47.3958
27.2292	111.062
27.1875	64.3958
27.1042	73.7708
27.0625	65.4375
27.0208	-114.062
26.9375	100.771
26.8125	41.3958
26.7708	59.8958
26.7292	94.3958
26.6875	58.8542
26.6458	100.521
26.2292	-13.3125
26.1458	29.8542
26.0625	0.270833
25.9792	105.188
25.6042	-97.2292
25.5625	63.2708
25.5625	73.3125
25.5208	-104.896
25.4375	-102.896
25.4375	-101.062
25.2292	18.8542
25.1875	103.438
25.1458	102.146
25.1042	84.3958
25.0625	34.6875
24.8542	26.6875
24.5625	74.7292
24.1875	-11.3125
24.0208	82.0625
23.8542	90.5625
23.5208	-12.1875
23.4375	-98.3125
23.4375	13.9375
23.2708	33.9375
23.2708	90.0208
23.1875	20.6875
23.1042	4.72917
22.9792	100.188
22.9375	98.5208
22.8542	-104.146
22.8542	88.7708
22.7708	8.97917
22.6875	83.2708
22.3958	1.27083
22.2292	59.6042
22.1458	79.3125
22.0625	47.3125
22.0208	14.8958
21.9792	70.9375
21.8958	98.1875
21.8125	101.979
21.6458	32.0625
21.5625	96.6875
21.5208	1.39583
21.3958	100.396
21.3542	14.4375
21.1875	-104.562
21.1875	-8.22917
21.1458	23.6458
20.9792	-87.1042
20.8958	100.688
20.8125	94.0208
20.8125	100.729
20.7708	-100.896
20.6875	3.14583
20.6458	26.8542
20.4375	85.0208
20.1042	46.5625
19.9375	76.5208
19.8542	-12.3125
19.6875	6.02083
19.6458	35.6875
19.5208	57.1875
19.3958	20.3125
19.3958	75.3125
19.2708	84.6875
19.1458	98.5625
18.8542	56.3125
18.6042	-70.4375
18.5625	53.1042
17.8542	4.14583
17.7292	101.438
17.7292	106.104
17.6875	35.8542
17.5625	-93.6042
17.5208	-93.1458
17.5208	9.0625
17.4792	99.5625
17.2292	45.2292
17.2292	100.729
17.1875	-6.9375
17.1042	21.3125
17.0208	53.9792
16.8542	97.6042
16.6458	44.2708
16.3958	-10.1875
16.1875	-7.22917
16.1875	78.2708
16.0625	103.062
15.6875	38.5208
15.5625	23.9792
15.3542	24.4375
15.3542	32.3125
15.1458	-5.60417
15.1458	5.5625
14.9375	9.27083
14.8542	-15.1458
14.7292	-15.1458
14.2292	10.4375
14.1042	104.771
13.8958	15.2708
13.8958	100.396
13.8125	120.146
13.6875	9.77083
13.6042	-86.1042
13.4792	17.1458
12.8125	99.1458
12.6458	102.646
12.6458	103.188
12.6042	16.2292
12.4792	7.0625
12.1875	102.396
11.7292	27.9375
11.6875	13.6875
11.3542	31.1458
11.2292	2.64583
11.0208	104.771
10.9375	19.5625
10.6875	-6.72917
10.6875	11.7708
10.6875	77.8125
10.1875	43.3542
10.1042	22.1042
9.89583	48.3125
9.85417	22.9792
9.52083	-70.8958
9.22917	18.5625
9.1875	50.6042
8.8125	40.5208
8.5625	24.4375
8.3125	7.89583
8.27083	-72.4375
8.1875	39.0208
7.89583	25.1875
7.72917	-10.1042
7.5625	14.8958
7.39583	21.9375
7.27083	-2.0625
7.0625	31.8542
6.72917	44.8958
6.5625	-70.0208
6.47917	-60.5625
6.27083	28.7708
6.22917	26.1875
5.85417	25.5625
5.8125	-4.14583
5.47917	33.3958
5.39583	21.4792
5.35417	-62.2708
5.0625	24.9375
5.02083	-8.64583
4.6875	18.3125
4.6875	28.5625
4.64583	24.2708
4.5625	-56.8125
4.5625	24.2292
4.52083	38.9375
3.47917	17.4792
3.4375	43.1042
3.27083	28.8125
3.14583	-55.4792
2.9375	35.5208
2.1875	20.5625
2.10417	12.5625
1.9375	33.7292
1.77083	15.4792
1.6875	25.9792
1.1875	-58.1042
1.14583	-68.9375
1.0625	-79.2292
0.979167	-79.4375
0.9375	122.271
0.395833	100.896
0.3125	110.021
0.104167	22.9375
-0.145833	12.4792
-0.354167	38.9375
-0.395833	-71.6458
-0.604167	-73.0625
-0.854167	30.3125
-1.3125	-65.1875
-1.64583	-45.3542
-1.8125	-69.5208
-1.8125	137.312
-1.9375	-75.7708
-1.9375	110.604
-2.02083	40.3125
-2.1875	10.3542
-2.27083	-74.2708
-2.27083	31.8542
-2.60417	30.0625
-2.64583	133.729
-2.85417	29.8125
-3.27083	-66.3958
-3.27083	22.1042
-3.3125	103.271
-3.85417	-72.9792
-3.89583	-70.8125
-3.97917	-42.2292
-4.22917	-78.1458
-4.47917	15.4792
-4.52083	120.146
-4.64583	-49.0208
-4.6875	-79.2708
-4.89583	-48.1875
-4.97917	-79.6042
-5.10417	-48.6042
-5.22917	33.0208
-5.5625	-62.0625
-5.9375	-80.6042
-6.1875	-46.3125
-6.72917	-48.1042
-6.77083	-76.8542
-6.89583	-53.9375
-7.27083	37.4375
-7.47917	19.8542
-7.60417	-78.3125
-7.6875	-66.7708
-8.02083	-37.6875
-8.1875	-67.1875
-8.64583	115.312
-8.6875	-77.2292
-8.85417	-50.6875
-9.0625	143.104
-9.3125	-68.4792
-10.1042	39.2292
-10.1875	-42.3125
-10.2292	32.6042
-10.2708	-41.1458
-10.8125	-77.0208
-10.9792	-63.4375
-11.2708	15.8958
-11.3958	130.771
-11.6458	-61.7708
-11.7708	34.7708
-12.2292	-61.2292
-12.4375	-71.6458
-12.8542	-56.6458
-13.0625	-44.4375
-13.0625	-41.9792
-13.1458	23.9375
-13.4375	-47.4792
-13.4792	130.646
-13.8542	48.3958
-13.9375	40.4792
-14.4375	132.896
-14.7292	131.188
-15.1042	135.396
-15.1458	21.2708
-15.1875	30.4792
-15.4375	-68.5625
-15.6458	-63.2292
-15.6458	17.7292
-15.9792	127.479
-16.1042	-61.0625
-16.3125	-73.1042
-16.3125	127.938
-16.4792	-61.8542
-16.5208	-51.3542
-16.5208	45.6042
-16.6458	28.3542
-16.6875	-56.3958
-17.0208	138.646
-17.0625	-46.8542
-17.0625	134.854
-17.3542	125.604
-17.9375	-40.7292
-17.9792	48.1875
-18.0208	-66.5208
-18.0625	133.146
-18.1875	17.4792
-18.5208	132.562
-18.6458	-58.0208
-18.6875	30.7292
-18.7708	-62.8125
-18.9792	139.688
-19.0625	146.271
-19.1458	-54.0208
-19.2292	28.2708
-20.3542	129.354
-20.3958	19.4375
-20.5208	-65.4375
-20.5208	146.312
-20.5625	164.312
-20.6875	132.146
-20.8542	-65.0208
-21.1458	147.979
-21.3958	-57.3542
-21.6458	131.812
-21.6875	20.6042
-21.6875	123.188
-22.0625	-42.8958
-22.1458	43.3125
-22.6458	149.438
-22.7292	-48.3125
-22.9375	16.6875
-22.9375	23.7708
-23.0625	126.479
-23.1042	116.604
-23.1458	27.6458
-23.4375	122.271
-23.4792	-48.4375
-23.7708	27.3125
-24.0625	25.1458
-24.2292	-68.0625
-24.4375	-55.8958
-24.5208	121.521
-24.6875	115.688
-24.8542	141.188
-24.9375	152.396
-24.9792	-51.8542
-25.1042	117.396
-25.1875	121.271
-25.2708	123.854
-25.5208	25.2708
-25.6042	124.146
-25.6042	147.771
-26.0208	149.312
-26.1875	148.021
-26.2292	20.9792
-26.2708	29.7292
-26.2708	122.729
-26.3125	152.812
-26.3958	142.104
-26.4792	131.729
-26.5208	138.396
-27.0625	28.1875
-27.0625	132.979
-27.1875	-51.2708
-27.4792	-66.7292
-28.1875	29.4375
-28.2708	127.979
-28.6875	28.2708
-28.8125	152.229
-29.0208	134.854
-29.2708	-62.6042
-29.3125	123.479
-29.3958	134.604
-29.6042	152.812
-29.6875	-56.1875
-29.6875	150.938
-29.8958	142.896
-30.0208	123.688
-30.1042	-59.8125
-30.4375	144.771
-30.4792	25.8125
-30.6042	-67.6042
-30.8125	-66.4792
-30.8542	-52.0208
-30.9792	-52.1458
-31.5208	150.438
-31.5625	123.812
-32.1458	149.438
-32.1875	-60.6458
-33.6875	19.6042
-33.8125	-69.3125
-34.2708	-66.3542
-35.6875	-70.8125
-35.8125	-72.1875
-35.8958	-66.6042
-36.2292	-65.9375
-36.6458	-67.4792
-37.0208	-63.2708
-37.0625	147.104
-37.5208	-68.8125
-38.1458	-66.0208
-38.2292	145.646
-38.3958	176.312
-38.7292	-67.7292
-39.9792	-71.1875
-40.2292	-62.6042
-44.3125	-71.1458
-45.4375	-73.0208
