# Supplementary material
Source: MDPI journal article supplement (https://www.mdpi.com/2073-4395/14/4/650)
Supplement: s1 [file s1 › Supplementary.pdf]

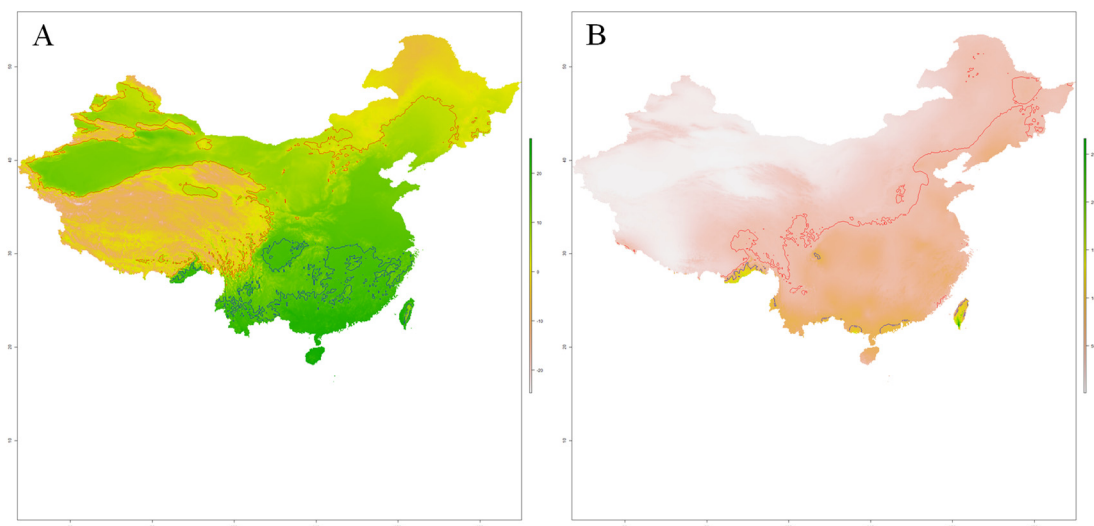

Figure S1. 4.1°C (red line) and 16.7°C (blue line) contours of Bio1 (A) and 366 mm (red line) and 897 mm (blue line) contours of Bio18 (B) on current climate conditions

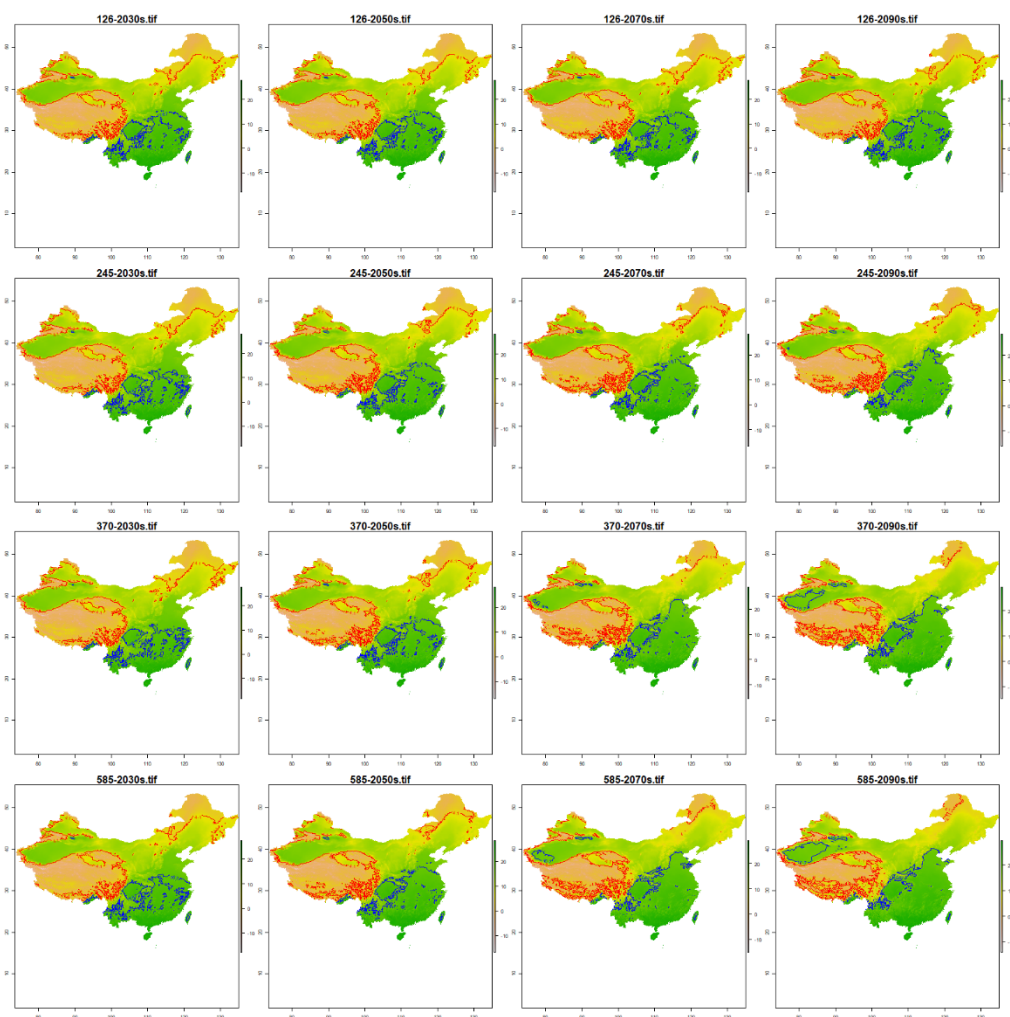

Figure S2. 4.1°C (red line) and 16.7°C (blue line) contours of Bio1 on future climate conditions

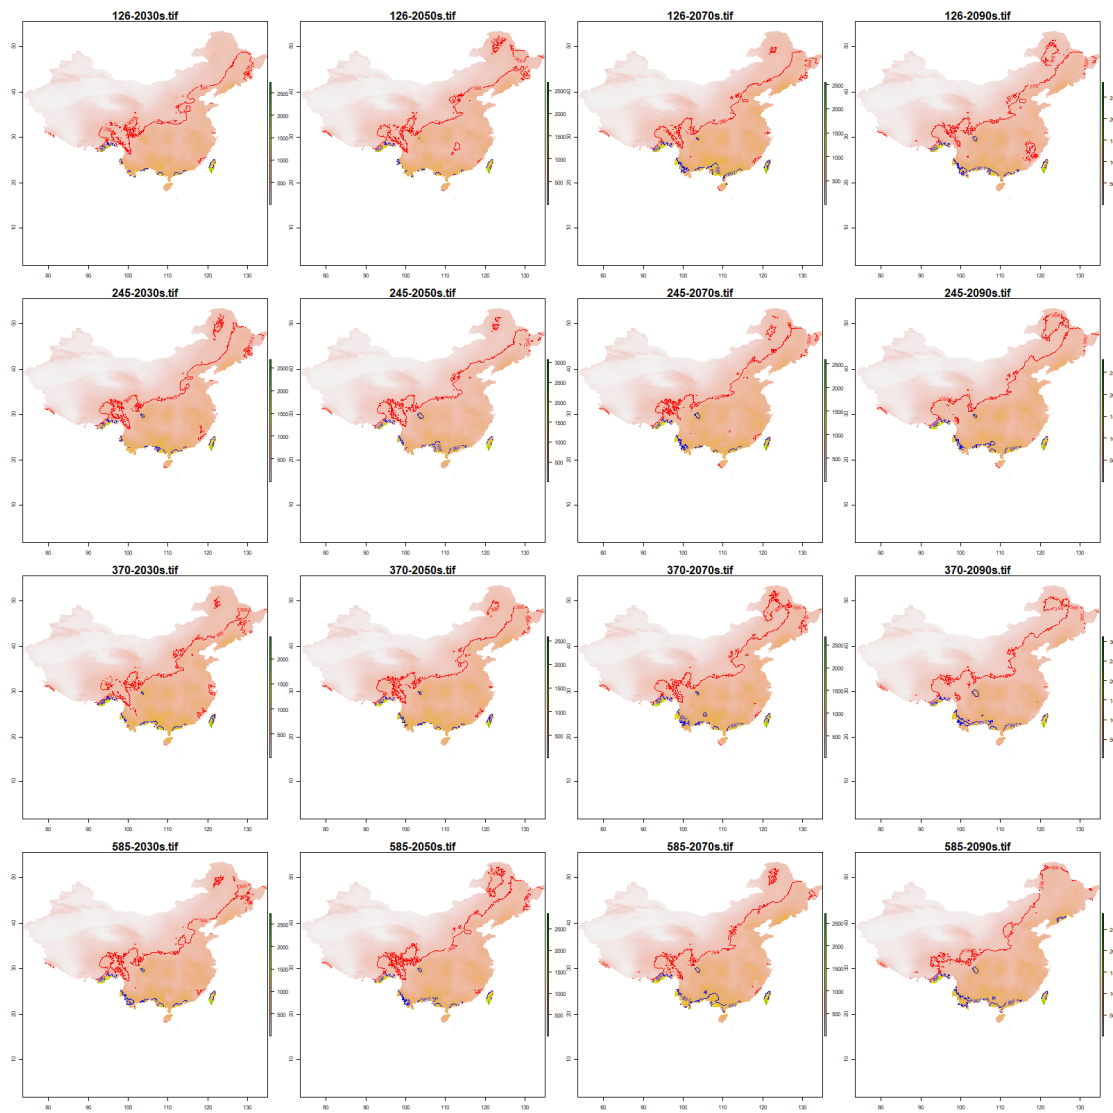

Figure S3. 366 mm (red line) and 897 mm (blue line) contours of Bio18 on future climate conditions
